# Supplementary material
Source: publisher figshare collection journal article supplement (https://acs.figshare.com/ndownloader/files/3950113)
Supplement: Supplementary file 1 [file 3950113]

## **Supporting Information for Common Origin of Green Luminescence in Carbon**

### **Nanodots and Graphene Quantum Dots**

Lei Wang,<sup>†</sup> Shou-Jun Zhu,<sup>‡</sup> Hai-Yu Wang,<sup>\*,†</sup> Song-Nan Qu,<sup>§</sup> Yong-Lai Zhang,<sup>†</sup> Jun-Hu Zhang,<sup>‡</sup> Qi-Dai Chen,<sup>†</sup> Huai-Liang Xu,<sup>†</sup> Wei Han,<sup>⊥</sup> Bai Yang<sup>\*,‡</sup> and Hong-Bo Sun<sup>\*,†,⊥</sup>

<sup>†</sup>*State Key Laboratory on Integrated Optoelectronics, College of Electronic Science and Engineering,* <sup>‡</sup>*State Key Laboratory of Supramolecular Structure and Materials, College of Chemistry,* <sup>⊥</sup>*College of Physics, Jilin University, 2699 Qianjin Street, Changchun 130012, China,* and <sup>§</sup>*State Key Laboratory of Luminescence and Applications, Changchun Institute of Optics, Fine Mechanics and Physics, Chinese Academy of Sciences, Changchun 130033, China*

Corresponding authors: [hbsun@jlu.edu.cn](mailto:hbsun@jlu.edu.cn), [haiyu\\_wang@jlu.edu.cn](mailto:haiyu_wang@jlu.edu.cn),  
[byangchem@jlu.edu.cn](mailto:byangchem@jlu.edu.cn)

## PL QY of samples

The QY was determined by slope method by the reference of 9,10-bis (phenylethynyl) anthracene in cyclohexane (QY=100%): compared the integrated photoluminescence intensity (425 nm excitation) and the absorbance value several values (less than 0.1 at excitation wavelength) gave the curve of the C-dots and GQDs samples with that of the references. Then used the equation:

$$\phi_x = \phi_{st} (K_x / K_{st}) (\eta_x / \eta_{st})^2$$

Where  $\phi$  is the QY,  $K$  is the slope determined by the curves and  $\eta$  is the refractive index. The subscript “ $st$ ” refers to 9,10-bis (phenylethynyl) anthracene and “ $x$ ” refers to the C-dots and GQDs.

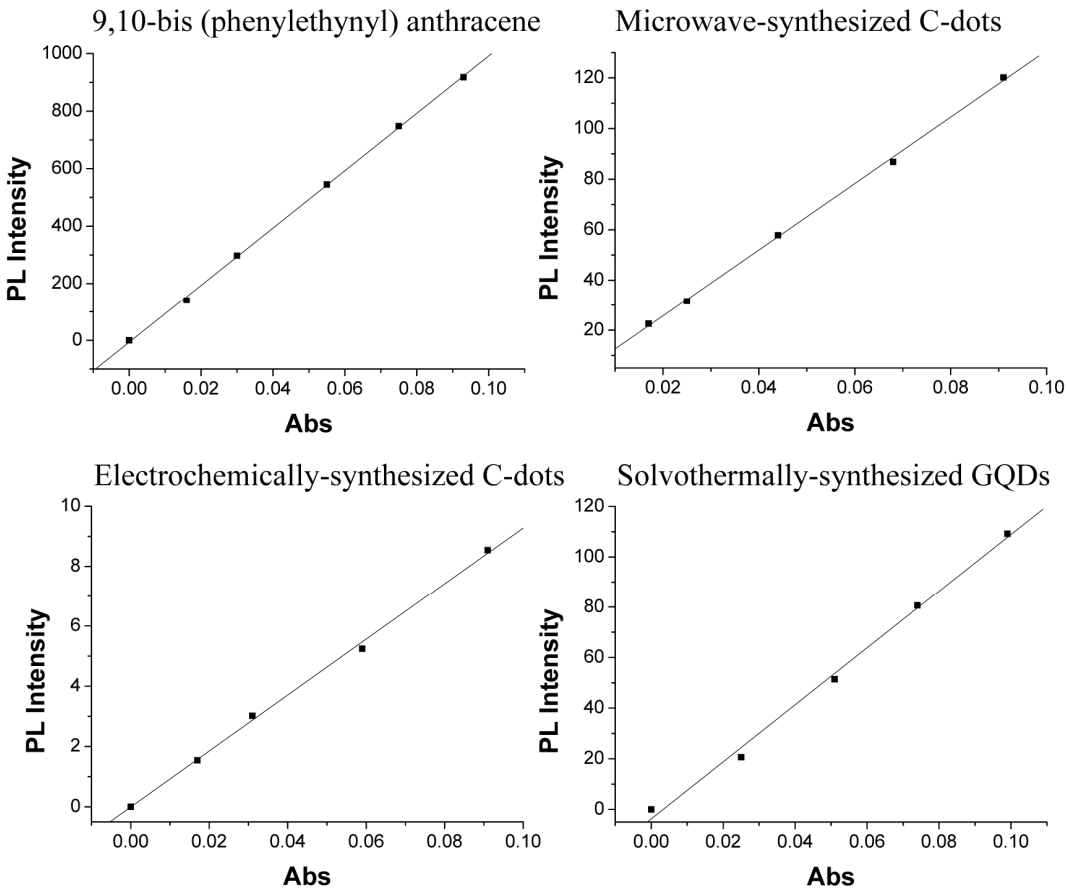

Table S1. PL QY of samples

| Serials    | 9,10-bis<br>(phenylethynyl)<br>anthracene | Microwave-synthesized<br>C-dots | Electrochemically-synthesized<br>C-dots | Solvothermally-synthesized<br>GQDs |
|------------|-------------------------------------------|---------------------------------|-----------------------------------------|------------------------------------|
| $K$        | 9985.77                                   | 1313.87                         | 92.79                                   | 1126.36                            |
| $\eta$     | 1.4264                                    | 1.33                            | 1.33                                    | 1.33                               |
| $\Phi$ (%) | 100                                       | 11.43                           | 0.81                                    | 9.81                               |

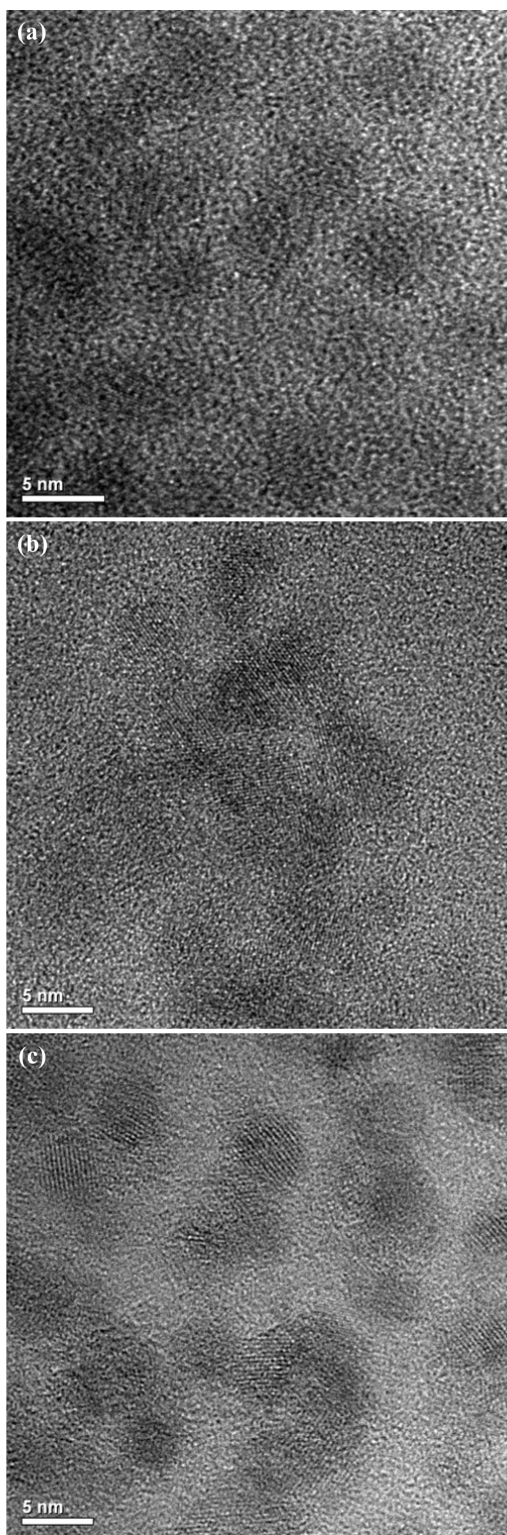

Figure S1. HRTEM images of (a) microwave-synthesized C-dots, (b) electrochemically-synthesized C-dots and (c) solvothermally-synthesized GQDs.

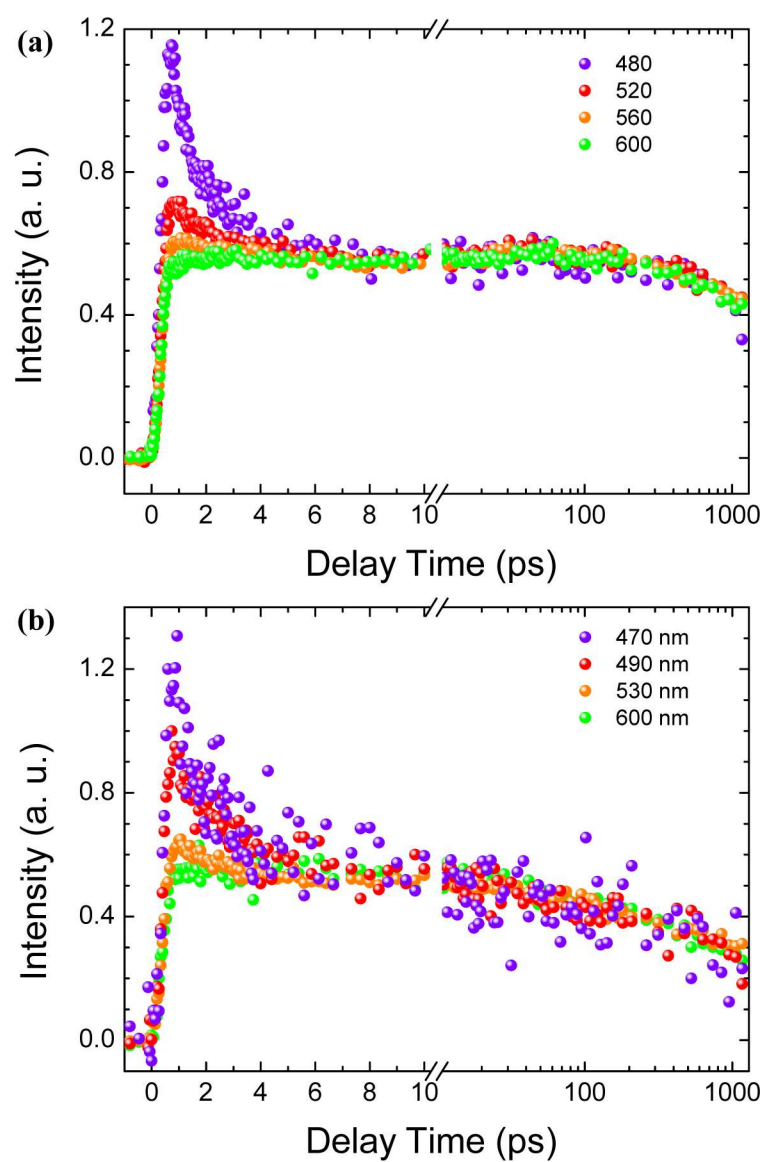

Figure S2. Wavelength-dependent PL dynamics for (a) microwave-synthesized C-dots and (b) solvothermally-synthesized GQDs at 400 nm excitation. All dynamics are normalized to the long delay time.

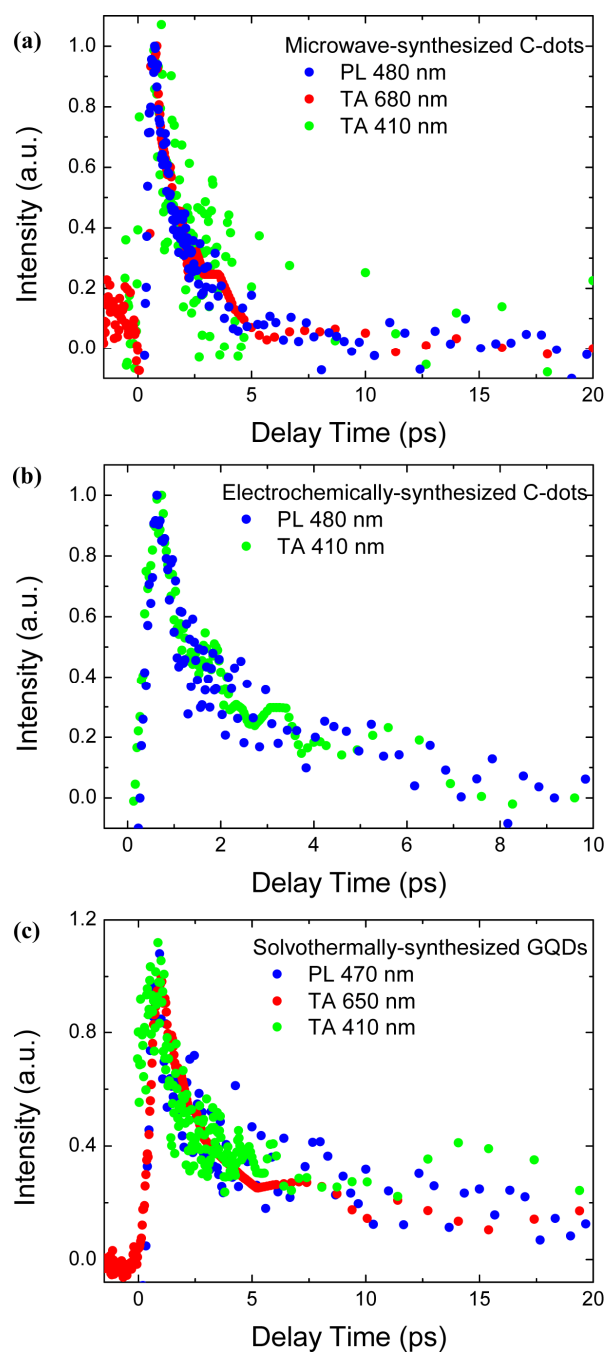

Figure S3. For short time scale, a comparative data between TA and femtosecond time-resolved PL experiments for (a) microwave-synthesized C-dots, (b) electrochemically-synthesized C-dots and (c) solvothermally-synthesized GQDs. The long lifetime component of kinetics is subtracted.

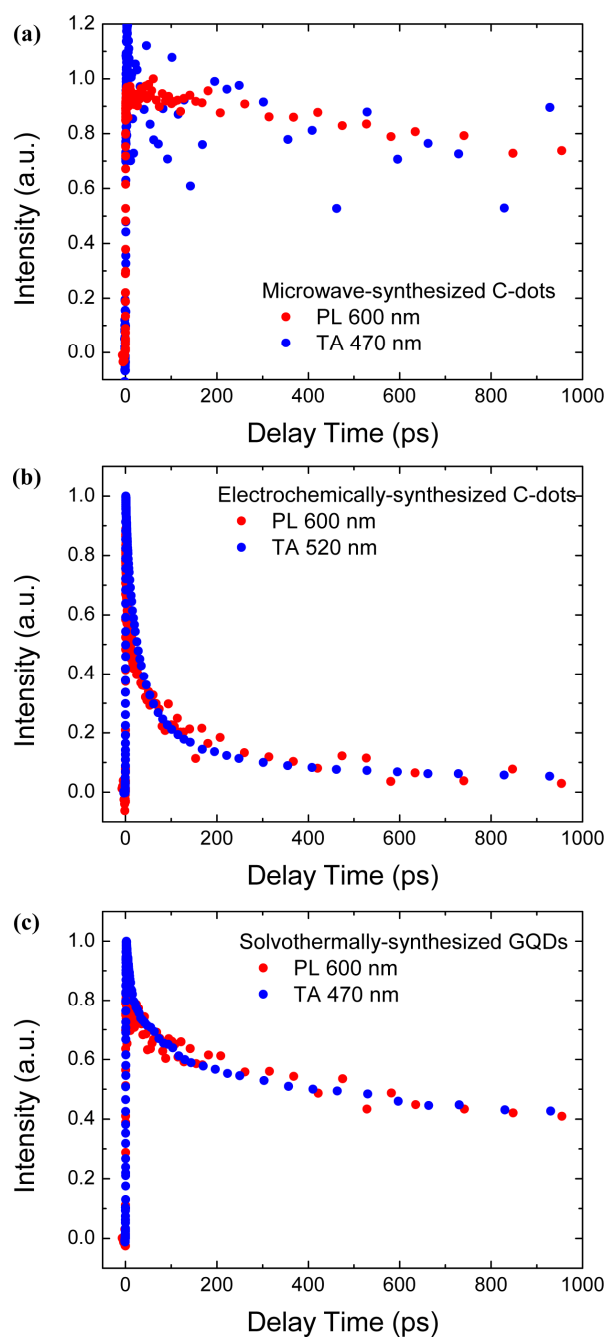

Figure S4. For long time scale, a comparative data between TA and femtosecond time-resolved PL experiments for (a) microwave-synthesized C-dots, (b) electrochemically-synthesized C-dots and (c) solvothermally-synthesized GQDs.

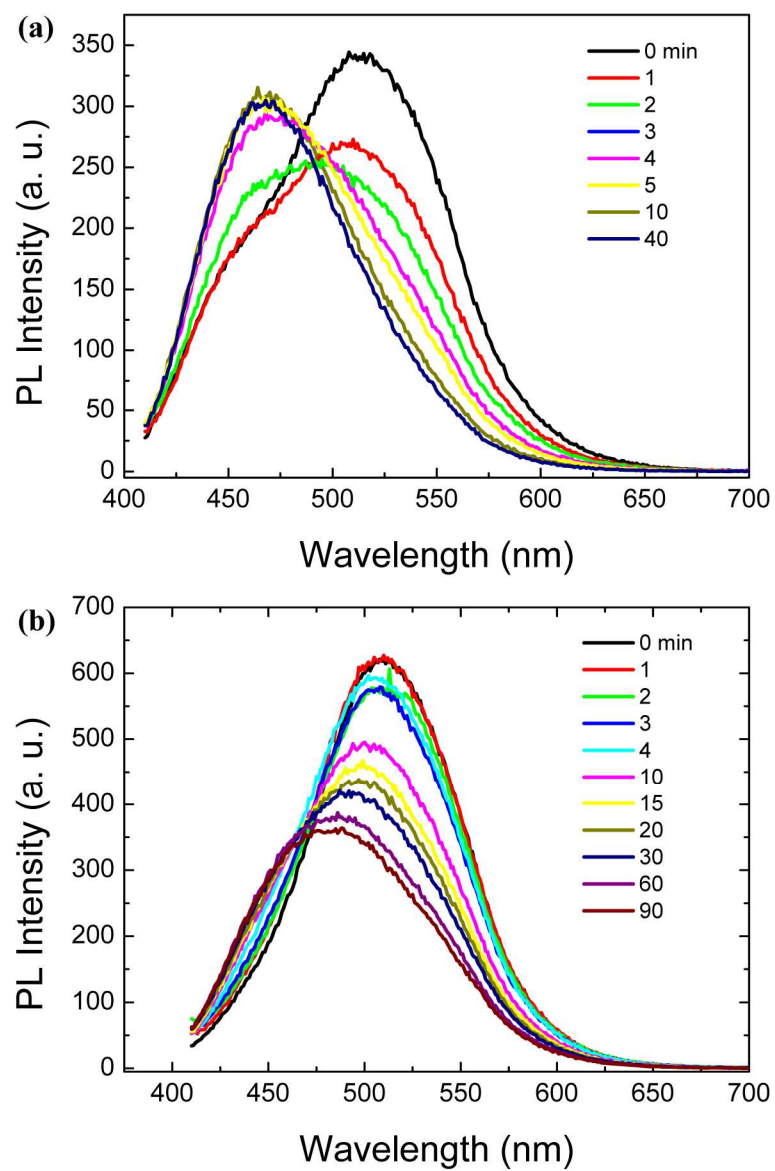

Figure S5. Steady-state PL evolution of (a) microwave-synthesized C-dots and (b) solvothermally-synthesized GQDs at different reduction times.



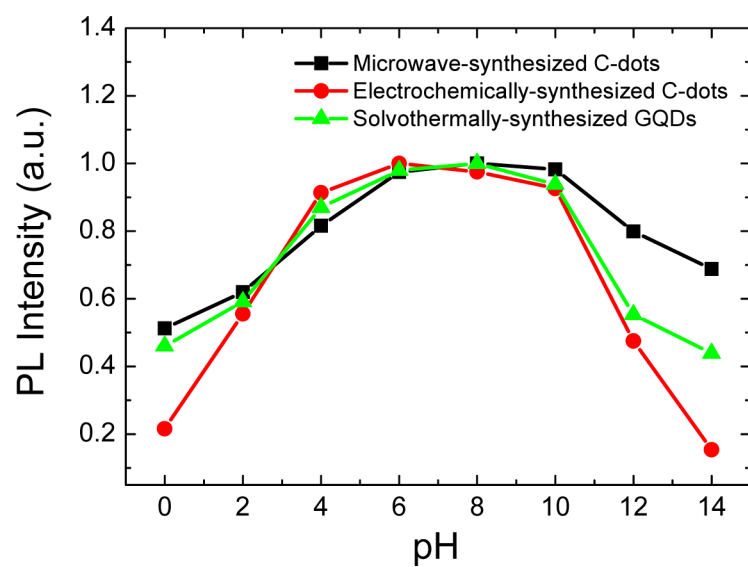

Figure S6. Normalized pH-dependent PL behavior for these studied C-dots and GQDs probed at green emission part.
